# Supplementary material for: The role of PANSS symptoms and adverse events in explaining the effects of paliperidone on social functioning: a causal mediation analysis approach
Source: PubMed Central journal article supplement (PMC6021395; doi:10.1038/s41537-018-0054-8), 2018-06-27
Supplement: 41537_2018_54_MOESM1_ESM.pdf [file 41537_2018_54_MOESM1_ESM.pdf]

*Example R Code for Mediation Analysis with Multiple Mediators*

```

# load library
library(plyr)
library(dplyr)
library(mice)
# set wd
# read dataset

##### imputation
meth.spec<-
c("pmm", "pmm", "", "", "", "", "", ""
")
imp.order<-
c("panss_sum_w0", "bars_w0", "max_srs", "pss_w0", "weight_w0", "bmi_w0", "srs_w0", "weight_
w6", "pss_w6", "pystdy_w0", "panss_sum_w5")
md.pattern(data)
input<- data
ini<-mice(input,maxit=0,meth=meth.spec,pri=FALSE)
pred<-ini$pred
# set order
vis <- ini$vis
vis <-vis[imp.order]
# impute data 10 times
M=50
impute<-mice(input,m=M,maxit=10,seed=500,pred=pred,vis=vis)

#####
#####
completedData<-complete(impute,M)
completedData$pgain<-(completedData$weight_w6-
completedData$weight_w0)/completedData$weight_w0
completedData$pgain2<-(completedData$pgain)*(completedData$pgain)
md.pattern(completedData)

# 4 mediators
# allow for mediators x treatment interaction
#M1=pgain at week 6
#M2=panss sum at week 5
#M4=max srs score

# bootstrap
nboot<-5000
te<-array(NA,c(nboot,50))
nde.int<-array(NA,c(nboot,50))
nie.int<-array(NA,c(nboot,50))
cde<-array(NA,c(nboot,50))
pnie_m1<-array(NA,c(nboot,50))
pnie_m2<-array(NA,c(nboot,50))
pnie_m4<-array(NA,c(nboot,50))

```

```

##### For loop iterate 10 imputed dataset
for (i in 1:M){
  df<-complete(baseline.impute,i)
  df$pgain<-(df$weight_w6-df$weight_w0)/df$weight_w0
  df$pgain2<-(df$pgain)*(df$pgain)
  cc<-as.matrix(c(0,0,0,0,0,0,0,0,0,0,0,mean(df$pystdy_w0)))
  yodadata<-df%>%filter(pystdy_w0<0)
  colnames(yodadata)

  #placebo vs paliperidone dose 1
  #placebo vs paliperidone dose 2
  #placebo vs paliperidone dose 3
  #placebo vs olanzapine
  #yodadata_palidose<-yodadata[which(yodadata$TRTGRPC==1|yodadata$TRTGRPC==2),] #3
  #yodadata_palidose<-yodadata[which(yodadata$TRTGRPC==1|yodadata$TRTGRPC==3),] #9
  yodadata_palidose<-yodadata[which(yodadata$TRTGRPC==1|yodadata$TRTGRPC==4),] #15

  for (j in 1:nboot){
    #obtain a bootstrap sample
    yodadata_palidose1_boot<-yodadata_palidose[sample(1:nrow(yodadata_palidose),
    replace = TRUE),]

    #outcome regression to estimate the total effect of trt on social functioning
    #TRT-Y
    reg.te.pss<-
    lm(pss_w6~as.factor(trtbin)+pss_w0+panss_sum_w0+bars_w0+srs_w0+bmi_w0
      +age+as.factor(sexbin)+as.factor(racebin)+as.factor(country)+pystdy_w0
      , data=yodadata_palidose1_boot)

    #mediator regressions to estimate the effect of trt on potential mediators:
    #M1=pgain_w6
    #M1_sq=pgain_w6^2
    #M2=panss_sum_w5

    #TRT->M1
    reg.m1<-lm(pgain~as.factor(trtbin)+pss_w0+panss_sum_w0+bars_w0+srs_w0+bmi_w0
      +age+as.factor(sexbin)+as.factor(racebin)+as.factor(country)+pystdy_w0
      , data=yodadata_palidose1_boot)

    #TRT->M2
    reg.m2<-
    lm(panss_sum_w5~as.factor(trtbin)+pss_w0+panss_sum_w0+bars_w0+srs_w0+bmi_w0
      +age+as.factor(sexbin)+as.factor(racebin)+as.factor(country)+pystdy_w0
      , data=yodadata_palidose1_boot)

    #outcome regression to estimate the effect of trt on social functioning
    adjusting

    reg.adj.pss.int<-lm(pss_w6~as.factor(trtbin)+pgain+pgain2+panss_sum_w5 +
      pss_w0+panss_sum_w0+bars_w0+srs_w0+bmi_w0+age+as.factor(sexbin)+
      as.factor(racebin)+as.factor(country)+pystdy_w0
      , data=yodadata_palidose1_boot)
  }
}

```

```

betac.m1<-as.matrix(reg.m1$coefficients[3:(length(reg.m1$coefficients))])
betac.m2<-as.matrix(reg.m2$coefficients[3:(length(reg.m2$coefficients))])

x10<-coef(reg.m1)[1]+t(cc)%*%betac.m1
x20<-coef(reg.m2)[1]+t(cc)%*%betac.m2

#Compute the effects of interest
#Total effect:
te[,i][j]<-coef(reg.te.pss)[2]
#CDE
cde[,i][j]<-coef(reg.adj.pss.int)[2]
#PNIE: beta1*theta2 (coefficient of trt in mediator regression * linear
coefficient of mediator in outcome regression + ((E(M|a,c)-E(M|a*,c))^2)*quadratic
coefficient of mediator in outcome regression
pnie_m1[,i][j]<-coef(reg.m1)[2]*coef(reg.adj.pss.int)[3]+((x10+coef(reg.m1)[2])^2-
(x10)^2)*coef(reg.adj.pss.int)[4]
pnie_m2[,i][j]<-coef(reg.m2)[2]*coef(reg.adj.pss.int)[5]
nde.int[,i][j]<-cde[,i][j]
nie.int[,i][j]<-pnie_m1[,i][j]+pnie_m2[,i][j]
print(i)
print(j)
}
}

```
